# Supplementary material
Source: PubMed Central journal article supplement (PMC4573243)
Supplement: mmc1.pdf [file mmc1.pdf]

The American Journal of Human Genetics

Supplemental Data

**Runs of Homozygosity: Association  
with Coronary Artery Disease and Gene Expression  
in Monocytes and Macrophages**

Paraskevi Christofidou, Christopher P. Nelson, Majid Nikpay, Liming Qu, Mingyao Li, Christina Loley, Radoslaw Debiec, Peter S. Braund, Matthew Denniff, Fadi J. Charchar, Ares Rocanin Arjo, David-Alexandre Trégouët, Alison H. Goodall, Francois Cambien, Willem H. Ouwehand, Robert Roberts, Heribert Schunkert, Christian Hengstenberg, Muredach P. Reilly, Jeanette Erdmann, Ruth McPherson, Inke R. König, John R. Thompson, Nilesh J. Samani, and Maciej Tomaszewski

## Supplemental text

### *Characteristics of study cohorts*

A total of 24,320 individuals recruited from 11 populations of white European ancestry were included in this project (1). All the studies included biologically unrelated individuals. Further details for each cohort used are given below.

#### Wellcome Trust Case-Control Consortium Study (WTCCC)

WTCCC cases: This British population includes 1,988 individuals with a validated history of either myocardial infarction (MI) or coronary revascularization (coronary artery bypass surgery - CABG or percutaneous coronary angioplasty - PCA) before the age of 66 years. Recruitment was carried out on a national basis and lasted 5 years (April 1998 – November 2003). A major proportion of biologically unrelated individuals with coronary artery disease (CAD) in this study come from families with two or more affected siblings conducted in UK - British Heart Foundation Family Heart Study (BHF-FHS) (2). Some individuals in this resource come from GRACE Study (3) that recruited individuals with CAD and familial history of premature CAD (in parents or sibling) but in whom an affected sibling was not available for recruitment.

In the WTCCC study, subjects from both BHF-FHS and GRACE cohorts were used together totalling 2,000 unrelated cases affected by premature CAD. 1,518 of those subjects were derived from BHF-FHS (2) and 470 subjects were from families included in GRACE study (3).

WTCCC controls: A population of 3,004 control subjects was derived from two independent publicly accessible sources: the British 1958 Birth Cohort (58BC) and a sample of blood donors from UK Blood Services (UKBS).

The 58BC, also known as the National Child Development Study (4), includes all births in England, Wales and Scotland during one week in 1958. From an original sample of over 17,000 births, survivors were followed up at ages 7, 11, 16, 23, 33 and 42 years. In a biomedical examination at 44-45 years, 9,377 cohort members were visited at home providing 7,692 blood samples. DNA was extracted from 1,500 cell lines (5) of subjects with self-reported white ethnicity and representative of gender and each geographical region were selected for use as controls.

The UKBS provided 1,500 controls from a sample of healthy blood donors recruited as a part of the WTCCC project (6). WTCCC in collaboration with UKBS set up a UK national repository of anonymised samples of DNA and viable mononuclear cells from 3,622 consenting blood donors (age range: 18-69 years, majority of them between 40-59 years). DNA used in this project was extracted from the leukocyte fraction retrieved from the standard blood sample. A set of 1,564 samples was selected from the total number of samples based on sex and geographical region to reproduce the distribution of the samples of the 1958 Birth Cohort for use as common controls in the WTCCC study. The subjects were about equally divided into males and females and both control groups were geographically widely distributed across the UK. Except from gender information and 10 year age-band, additional phenotypic information was not available on the control cohorts (5-6).

#### German Myocardial Infarction Family Study I (GerMIFSI)

GerMIFSI cases: This population consists of 875 biologically unrelated individuals with a validated history of MI before the age of 60 years. The recruitment was carried out after screening >200,000 clinical charts in 17 cardiac in-hospital rehabilitation centres. The majority (>70%) of individuals were recruited in the surrounding area of Augsburg and the Southern part of Germany between 1997 and 2002. All individuals were of white German origin. If at least one additional first-degree family member (preferentially a sibling) had suffered from MI or had severe CAD (history of PCA or CABG), the family (index patient, available parents and all siblings) was approached and asked to join the study (7-8). All events in index cases and family members were validated through inspection of hospital charts.

GerMIFSI controls: All 1,644 CAD-free controls had German descent and were collected for the MONICA/KORA Augsburg population study in the years 1994/1995 and a follow up of this project in the years 2004/2005 that was undertaken as part of the German National Genome

Research Network (NGFN) (9). This population represents a gender- and age- stratified random sample of all German residents of the Augsburg area and consists of individuals 25 to 74 years of age, with about 300 subjects for each 10-year age band. These individuals were studied by physical examination, blood testing, and a standardized interview including medical history, physical activity, medication and personal habits.

#### German Myocardial Infarction Family Study II (GerMIFSII)

GerMIFSII cases: This population consists of 1,222 individuals with a validated history of MI before the age of 60 years for both men and women (10). A positive family history for CAD was documented in 726 (59.4%) of individuals. Individuals were identified following their admission for acute treatment of MI or in cardiac rehabilitation clinics.

GerMIFSII controls: A total of 820 CAD-free controls were derived from the MONICA/KORA Augsburg survey S4 (11). A sample of 478 controls was taken from PopGen blood donor sample 2 (PopGen-DSP) (12).

#### German Myocardial Infarction Family Study III (GerMIFSI - KORA)

GerMIFSI cases: A total of 1,157 subjects with available DNA were derived from individuals with non-fatal MI in the KORA registry (13). Hospitalised survivors of MI aged 26-74 years are routinely entered into this registry (14). The diagnosis of MI was made with the use of algorithm of the World Health Organization's Multinational Monitoring of Trends and Determinants in Cardiovascular Disease (MONICA) project (15).

GerMIFSI controls: A total of 996 and 752 CAD-free controls were derived from the population-based Augsburg KORA S4/F4 study (16) and PopGen respectively (12).

#### Ottawa Heart Genomics Study (OHGS)

The OHGS is a hospital-based study of CAD conducted at the Ottawa Heart Institute in Ottawa, Canada. Individuals who underwent CABG, coronary artery angiography, or receive treatment for MI were invited to participate in the study (17-18). Three independent samples (OHGS-A, OHGS-B and OHGS-C) were ascertained consecutively for this study.

OHGS cases: Individuals with documented CAD (stenosis in a major epicardial vessel of at least 50%; PCA; CABG or MI before the age of 55 years in men and 65 years in women) were recruited for OHGS as cases. Individuals with history of diabetes mellitus of severe dyslipidemia were excluded.

OHGS controls: Healthy elderly controls (men aged >65 years and women aged >70 years) were recruited via an extensive newspaper and television advertising campaign in the Ottawa community. Controls were carefully interviewed by a physician or nurse to ascertain that they were free of symptoms of possible ischemic arterial disease and had no past history of cardiovascular symptoms, a positive stress test, coronary angiography demonstrating stenosis (>50%) in any artery or clinical cardiovascular events. Individuals with the same ethnic background as the cases were included in this study. Controls for all three studies were collected consecutively as described for cases.

#### Cleveland Clinic Gene Bank (CCGB)

All cases in CCGB study were recruited using the same criteria as in OHGS (18). Individuals were included if they had at least one of the following before the age of 55 years (men) or 65 years (women): angiographically documented stenosis in a major epicardial artery of at least 50%; history of MI, PCA or CABG. Diabetes was an exclusion criterion.

#### The Duke Cathgen Study (DUKE)

Subjects were recruited from the cardiac centre at Duke, Canada. Cases had at least one epicardial coronary vessel with  $\geq 50\%$  stenosis documented before age of 55 years (men) or 65 years (women). Controls ( $\geq 50$  years of age) were recruited from amongst individuals who underwent coronary angiography and had no more than 30% stenosis in maximally one epicardial coronary artery. Any subject with diabetes mellitus, severe pulmonary hypertension or congenital heart disease was excluded from DUKE Study.

### PennCATH

PennCATH is a university of Pennsylvania Medical Center based coronary angiographic study. Briefly, between July 1998 and March 2003, PennCATH recruited a consecutive cohort of individuals undergoing cardiac catheterization and coronary angiography (19-20). Cases were required to have at least one stenosis of  $\geq 50\%$  in at least one of major epicardial arteries before the age of 60 for males and 65 for women. In contrast, CAD-free controls (aged  $>40$  years /men/ and  $>45$  years /women/) had no stenosis exceeding 10% in any major epicardial artery.

### INTERHEART study

The INTERHEART study used worldwide cases and controls of European ethnicity (21). Study participants were recruited from 262 centres from 52 countries in Asia, Europe, the Middle East, Africa, Australia, North America, and South America. In this project only a small subset of Canadian individuals (848) of European ancestry was used. Briefly, all individuals (irrespective of age) admitted to the coronary care unit presenting within 24 hours of symptom onset, were screened. Cases were eligible if they had characteristic symptoms plus electrocardiogram changes indicative of a new MI. At least one age-matched (up to 5 years older or younger) and sex-matched control (no previous diagnosis of heart disease or history of exertional chest pain) was recruited per case, using specific criteria.

**Members of the Cardiogenics Consortium:** Tony Attwood<sup>1</sup>, Stephanie Belz<sup>2</sup>, Peter Braund<sup>3</sup>, Jessy Brocheton<sup>4</sup>, Jason Cooper<sup>5</sup>, Abi Crisp-Hihn<sup>1</sup>, Patrick Diemert (formerly Linsel-Nitschke)<sup>2</sup>, Jeanette Erdmann<sup>2</sup>, Nicola Foad<sup>1</sup>, Tiphaine Godefroy<sup>4</sup>, Jay Gracey<sup>3</sup>, Emma Gray<sup>6</sup>, Rhian Gwilliams<sup>6</sup>, Susanne Heimerl<sup>7</sup>, Christian Hengstenberg<sup>7</sup>, Jennifer Jolley<sup>1</sup>, Unni Krishnan<sup>3</sup>, Heather Lloyd-Jones<sup>1</sup>, Ulrika Liljedahl<sup>8</sup>, Ingrid Lugauer<sup>7</sup>, Seraya Maouche<sup>2,4</sup>, Jasbir S Moore<sup>3</sup>, Gilles Montalescot<sup>4</sup>, David Muir<sup>1</sup>, Elizabeth Murray<sup>1</sup>, Chris P Nelson<sup>3</sup>, Jessica Neudert<sup>9</sup>, David Niblett<sup>6</sup>, Karen O'Leary<sup>1</sup>, Helen Pollard<sup>3</sup>, Carole Proust<sup>4</sup>, Angela Rankin<sup>1</sup>, Augusto Rendon<sup>10</sup>, Catherine M Rice<sup>6</sup>, Hendrik Sager<sup>2</sup>, Nilesh J Samani<sup>3,11</sup>, Jennifer Sambrook<sup>1</sup>, Heribert Schunkert<sup>2</sup>, Gerd Schmitz<sup>12</sup>, Michael Scholz<sup>9</sup>, Laura Schroeder<sup>2</sup>, Jonathan Stephens<sup>1</sup>, Stefanie Tennstedt (formerly Gulde)<sup>2</sup>, Chris Wallace<sup>5</sup>.

<sup>1</sup>Department of Haematology, University of Cambridge, Long Road, Cambridge, CB2 2PT, UK and National Health Service Blood and Transplant, Cambridge Centre, Long Road, Cambridge, CB2 2PT, UK; <sup>2</sup>Medizinische Klinik II, Universität zu Lübeck, Lübeck Germany; <sup>3</sup>Department of Cardiovascular Sciences, University of Leicester, Glenfield Hospital, Groby Road, Leicester, LE3 9QP, UK; <sup>4</sup>INSERM UMR5 937, Pierre and Marie Curie University (UPMC, Paris 6) and Medical School, 91 Bd de l'Hôpital 75013, Paris, France; <sup>5</sup>Juvenile Diabetes Research Foundation/Wellcome Trust Diabetes and Inflammation Laboratory, Department of Medical Genetics, Cambridge Institute for Medical Research, University of Cambridge, Wellcome Trust/MRC Building, Cambridge, CB2 0XY, UK; <sup>6</sup>The Wellcome Trust Sanger Institute, Wellcome Trust Genome Campus, Hinxton, Cambridge CB10 1SA, UK; <sup>7</sup>Klinik und Poliklinik für Innere Medizin II, Universität Regensburg, Germany; <sup>8</sup>Molecular Medicine, Department of Medical Sciences, Uppsala University, Uppsala, Sweden; <sup>9</sup>Trium, Analysis Online GmbH, Hohenlindenerstr. 1, 81677, München, Germany; <sup>10</sup>European Bioinformatics Institute, Wellcome Trust Genome Campus, Hinxton, Cambridge, CB10 1SD, UK; <sup>11</sup>Leicester NIHR Biomedical Research Unit in Cardiovascular Disease, Glenfield Hospital, Leicester, LE3 9QP, UK; <sup>12</sup>Institut für Klinische Chemie und Laboratoriumsmedizin, Universität, Regensburg, D-93053 Regensburg, Germany.

## Supplemental Figures

Figure S1: Measures of homozygosity in each cohort. A - average run number, B - average run length, C - average total run length in the autosomal genome. The boxes are median values, the upper edge of the box - the 75<sup>th</sup> percentile, the lower edge - the 25<sup>th</sup> percentile of runs of homozygosity distribution.

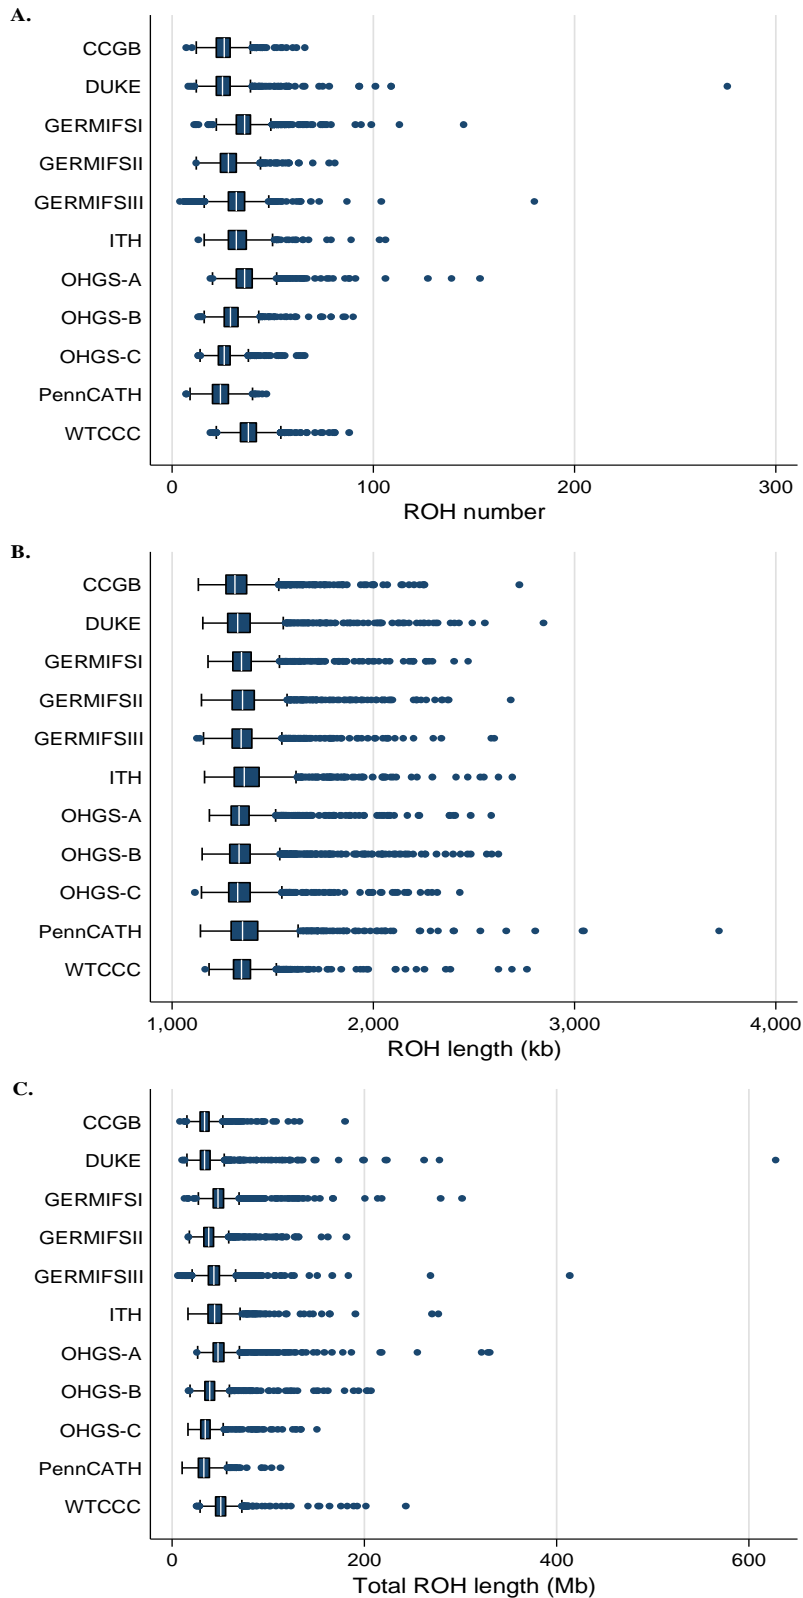

Figure S2: Measures of homozygosity in each cohort split by case control status. A - average run number, B - average run length, C - average total run length in the autosomal genome. The boxes are median values, the upper edge of the box - the 75<sup>th</sup> percentile, the lower edge - the 25<sup>th</sup> percentile of runs of homozygosity distribution.

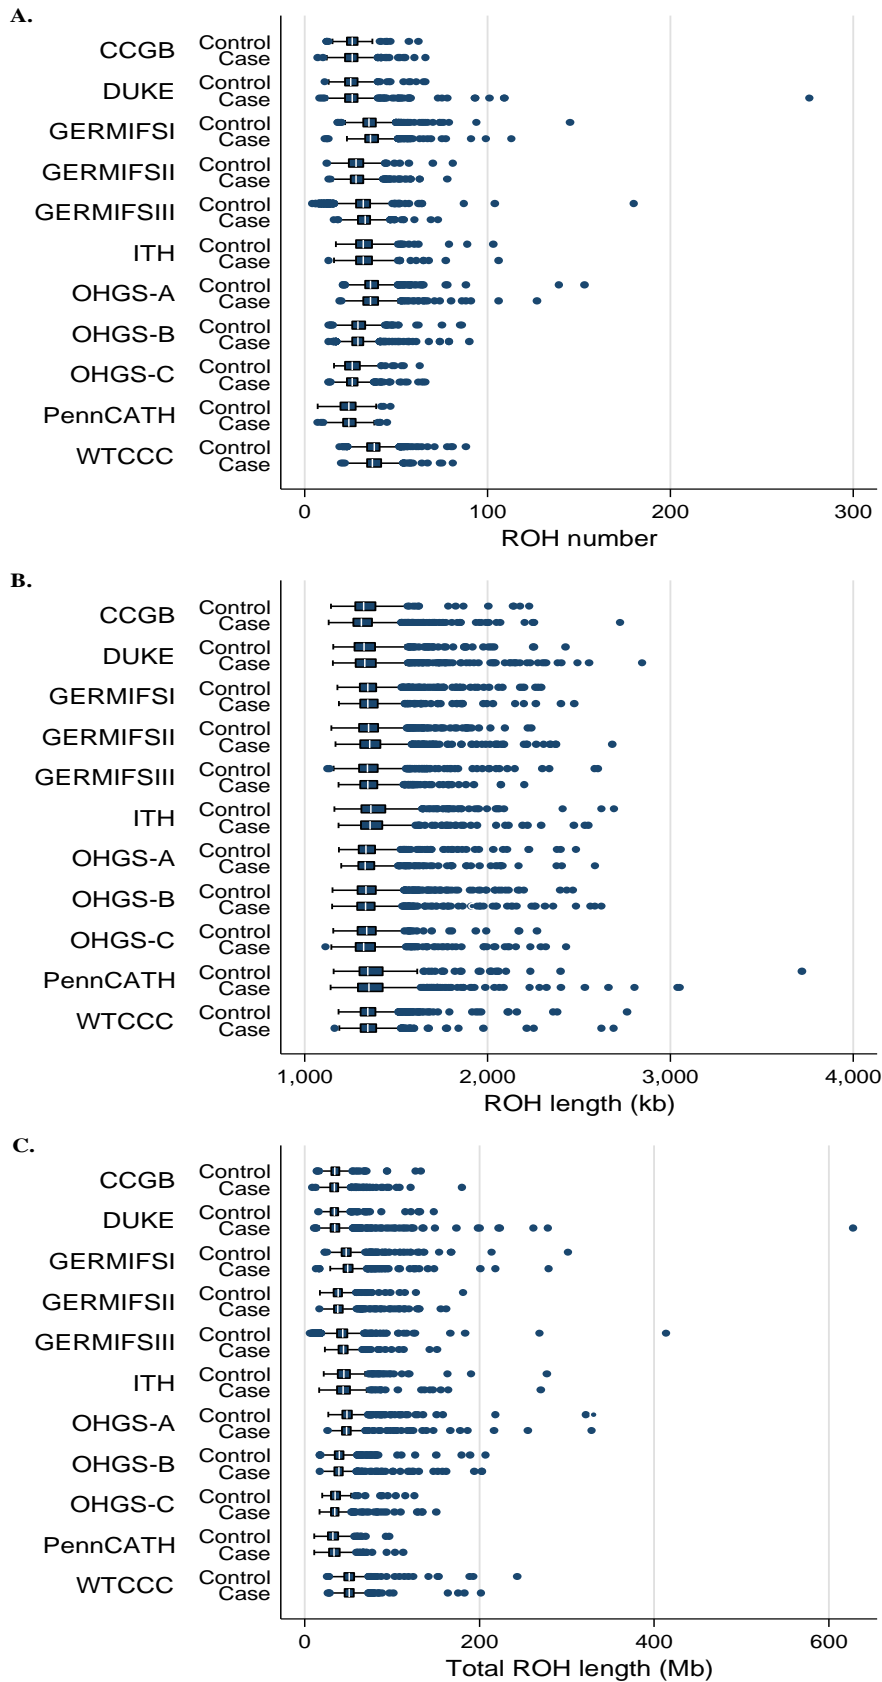

Figure S3: An example of overlapping consensus ROH on chromosome 1 shared by 9 populations. X axis - physical distance of the chromosome, Y axis - individual populations

A.

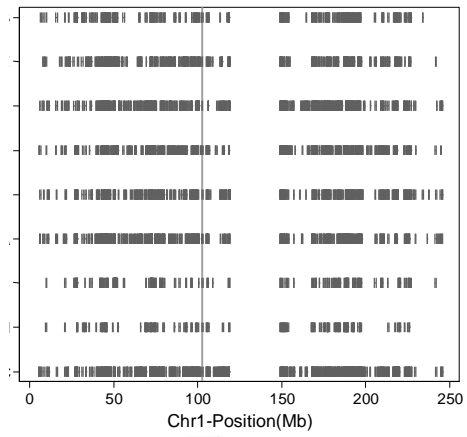

B.

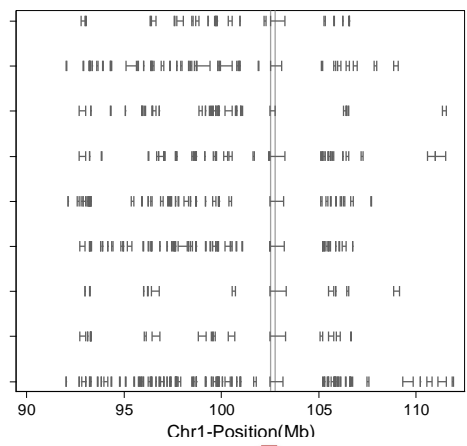

C.

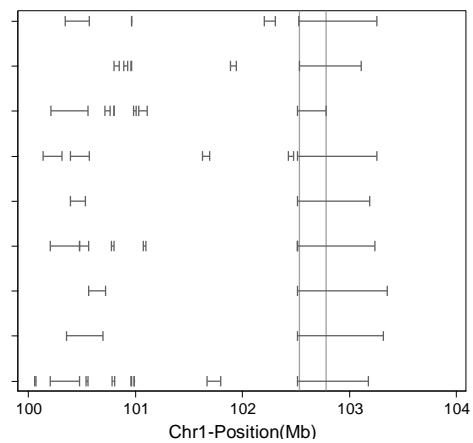

### Supplemental Tables

Table S1: Characteristics of cohorts used in the analysis.

| Study    | Origin   | Number of subjects | Cases/Controls | %MI  | %female (cases/controls) | Cases age (years) | Controls age (years) | CAD definition                                                                       |
|----------|----------|--------------------|----------------|------|--------------------------|-------------------|----------------------|--------------------------------------------------------------------------------------|
| CCGB     | Canadian | 1971               | 1607/364       | 60.3 | 24.2/46.7                | 48.5 (7.3)        | 73.9 (5.2)           | Angiographic (>50% stenosis)                                                         |
| DUKE     | Canadian | 1820               | 1180/640       | 48.1 | 30.7/57.8                | 56.6 (9.8)        | 63.3 (8.7)           | Angiographic (>50% stenosis)                                                         |
| GERMIFSI | German   | 2486               | 882/1604       | 100  | 32.8/50.8                | 50.2 (7.9)        | 62.6 (10.0)          | MI (<65 yrs) with >1 1 <sup>st</sup> degree sibling with severe CAD (PTCA; MI; CABG) |
| GERMIFSI | German   | 2506               | 1222/1284      | 100  | 20.9/48.1                | 51.4 (7.5)        | 51.1 (12.0)          | MI (<60 yrs); 59.4% with family history of CAD                                       |
| GERMIFSI | German   | 2900               | 1152/1748      | 100  | 20.2/48.9                | 58.6 (8.7)        | 55.9 (10.7)          | MI (<60 yrs); MONICA criteria                                                        |
| ITH      | Canadian | 848                | 402/446        | 64.0 | 29.1/33.0                | 63.1 (10.6)       | 64.2 (10.3)          | Angiographic (>50% stenosis)                                                         |
| OHGS-A   | Canadian | 1911               | 913/998        | 64.3 | 22.0/45.5                | 48.2 (6.9)        | 74.9 (4.9)           | Angiographic (>50% stenosis)                                                         |
| OHGS-B   | Canadian | 2778               | 1272/1506      | 55.6 | 26.8/52.8                | 49.3 (7.4)        | 75.0 (5.3)           | Angiographic (>50% stenosis)                                                         |



|          |          |      |           |      |           |            |            |                                                                                                                     |
|----------|----------|------|-----------|------|-----------|------------|------------|---------------------------------------------------------------------------------------------------------------------|
| OHGS-C   | Canadian | 1152 | 835/317   | 44.3 | 6.2/64.7  | 56.1 (6.9) | 76.0 (6.3) | Angiographic (>50% stenosis)                                                                                        |
| PennCATH | USA      | 1084 | 732/352   | 50.3 | 22.1/48.9 | 52.6 (7.6) | 61.3 (9.5) | Angiography ( $\geq 1$ coronary vessel<br>with >50% stenosis); $\leq 60$ for<br>males and<br>$\leq 65$ for females. |
| WTCCC    | British  | 4864 | 1926/2938 | 71.5 | 20.7/50.8 | 49.8 (7.7) | 43.7 (8.7) | Validated MI, CABG, PTCA or<br>angina with positive non-invasive<br>testing <66 yrs                                 |

---

Data are counts and percentages or means and standard deviations, CAD – coronary artery disease, MI – myocardial infarction, CABG – coronary artery bypass grafting, PTCA – percutaneous transluminal coronary angioplasty, CCGB – Cleveland Clinic Gene Bank, DUKE – Duke Cathgen Study, GERMIFSI, II, III – German Myocardial Infarction Family Studies, ITH – InterHeart Study, OHGS-A,B,C – Ottawa Heart Genomics Studies, WTCCC – Wellcome Trust Case Control Consortium, yrs – years

Table S2: Genotyping information for each study.

| Study acronym     | CCGB           | DUKE             | GerMIFSI                      | GerMIFSI       | GerMIFSI                                   | ITH                            | OHGS-A                  | OHGS-B                         | OHGS-C           | PennCATH       | WTCCC                             |
|-------------------|----------------|------------------|-------------------------------|----------------|--------------------------------------------|--------------------------------|-------------------------|--------------------------------|------------------|----------------|-----------------------------------|
| Platform          | Affymetrix 6.0 | Affymetrix Axiom | Affymetrix NSP and STY        | Affymetrix 6.0 | Affymetrix Genome-Wide Human SNP Array 6.0 | Affymetrix Human SNP Array 6.0 | Affymetrix Mapping 500K | Affymetrix Human SNP Array 6.0 | Affymetrix Axiom | Affymetrix 6.0 | Affymetrix Mapping 500K Array Set |
| Calling algorithm | Birdseed       | AxiomGT1         | Birdseed                      | BRLMM          | Birdseed                                   | Birdseed                       | BRLMM                   | Birdseed                       | AxiomGT1         | Birdseed       | CHIAMO                            |
| Genotyped SNPs    | 447,580        | 360,462          | 262,338(NSP)/<br>238,378(STY) | 909,622        | 503,590                                    | 492,837                        | 349,183                 | 420,531                        | 366,254          | 869,223        | 477,459                           |
| Total SNPs        | 1,779,828      | 1,999,530        | 2,543,887                     | 2,543,887      | 2,536,369                                  | 2,004,234                      | 1,688,980               | 1,756,731                      | 1,990,154        | 2,749,197      | 2,614,446                         |

SNP – single nucleotide polymorphism, CCGB – Cleveland Clinic Gene Bank, DUKE – Duke Cathgen Study, GERMIFSI, II, III – German Myocardial Infarction Family Studies, ITH – InterHeart Study, OHGS-A, B, C – Ottawa Heart Genomics Studies, WTCCC – Wellcome Trust Case Control Consortium.

Table S3: Summary of homozygosity measures for each examined study.

| Study        | Number of subjects | Average ROH number | ROH number range | Average total ROH length (kb) | Average ROH length (kb) | FROH        |
|--------------|--------------------|--------------------|------------------|-------------------------------|-------------------------|-------------|
| CCGB         | 1971               | 25.92 (5.60)       | 7-66             | 34885.64<br>(10257.83)        | 1336.86 (122.87)        | 1.26 (0.37) |
| DUKE         | 1820               | 26.59 (9.54)       | 8-276            | 36948.16<br>(22189.18)        | 1359.07 (157.21)        | 1.33 (0.80) |
| GERMIFSI     | 2486               | 36.35 (7.40)       | 11-145           | 49924.54<br>(15203.16)        | 1362.30 (112.46)        | 1.80 (0.55) |
| GERMIFSI II  | 2506               | 28.48 (6.09)       | 12-81            | 39399.01<br>(11876.63)        | 1372.28 (129.59)        | 1.42 (0.43) |
| GERMIFSI III | 2900               | 31.79 (8.12)       | 4-180            | 43538.19<br>(14700.81)        | 1359.09 (106.40)        | 1.57 (0.53) |
| ITH          | 848                | 33.22 (8.37)       | 13-106           | 47501.14<br>(19879.07)        | 1404.99 (181.33)        | 1.71 (0.72) |
| OHGS-A       | 1911               | 36.70 (8.31)       | 19-153           | 50399.93<br>(18662.56)        | 1357.36 (126.61)        | 1.82 (0.67) |
| OHGS-B       | 2778               | 29.57 (6.31)       | 13-90            | 40508.82<br>(13225.52)        | 1357.49 (134.19)        | 1.46 (0.48) |
| OHGS-C       | 1152               | 26.43 (6.11)       | 13-66            | 36155.99<br>(12257.42)        | 1354.30 (137.87)        | 1.30 (0.44) |
| PennCATH     | 1084               | 24.32 (5.74)       | 7-47             | 34093.18<br>(10505.12)        | 1393.30 (198.39)        | 1.23 (0.38) |
| WTCCC        | 4864               | 37.78 (6.09)       | 19-88            | 51250.29<br>(10376.44)        | 1354.20 (84.65)         | 1.85 (0.37) |

Data are means and standard deviations or absolute values and percentages, ROH – run of homozygosity, FROH – proportion of autosomal genome in ROHs, CCGB – Cleveland Clinic Gene Bank, DUKE – Duke Cathgen Study, GERMIFSI, II, III – German Myocardial Infarction Family Studies, ITH – InterHeart Study, OHGS-A, B, C – Ottawa Heart Genomics Studies, WTCCC – Wellcome Trust Case Control Consortium.

Table S4: Differences in homozygosity measures between individuals with coronary artery disease and controls – random effects model-based sensitivity analysis.

| Measure                           | Un-adjusted analysis        |                 |                       | Age-adjusted analysis       |                 |                        | Age- and sex-adjusted analysis |                 |                        |
|-----------------------------------|-----------------------------|-----------------|-----------------------|-----------------------------|-----------------|------------------------|--------------------------------|-----------------|------------------------|
|                                   | $\beta$ -coefficient/<br>OR | 95% CI          | P-value               | $\beta$ -coefficient/<br>OR | 95% CI          | P-value                | $\beta$ -coefficient/<br>OR    | 95% CI          | P-value                |
| Average ROH number                | 0.38                        | 0.20, 0.57      | $5.21 \times 10^{-5}$ | 0.66                        | 0.46, 0.86      | $6.25 \times 10^{-11}$ | 0.62                           | 0.42, 0.83      | $2.08 \times 10^{-9}$  |
| Average ROH length (kb)           | 2.47                        | -0.84, 5.77     | 0.144                 | 5.16                        | 1.61, 8.71      | 0.004                  | 4.46                           | 0.81, 8.11      | 0.017                  |
| Average total length of ROHs (kb) | 668.01                      | 294.31, 1041.70 | $4.59 \times 10^{-4}$ | 1124.83                     | 723.67, 1525.99 | $3.89 \times 10^{-8}$  | 1028.30                        | 615.78, 1440.83 | $1.03 \times 10^{-6}$  |
| FROH                              | 1.06                        | 1.03, 1.10      | $1.46 \times 10^{-4}$ | 1.13                        | 1.10, 1.17      | $4.67 \times 10^{-13}$ | 1.13                           | 1.09, 1.17      | $3.24 \times 10^{-11}$ |

Data for number, average length and total length of ROHs are  $\beta$ -coefficients [with respective confidence intervals and level of statistical significance (P-value)] from regressing homozygosity measures on case-control status with adjustment for cohort as a random effect, age and sex (where appropriate)]; data on FROH are expressed as odds ratios (OR) of coronary artery disease risk (with confidence intervals and level of statistical significance) with adjustment for cohort as a random effect, age and sex (where appropriate); 95% CI – 95% confidence intervals, ROH – run of homozygosity, FROH – proportion of autosomal genome in ROHs.

Table S5. Differences in homozygosity measures between individuals with coronary artery disease and disease free controls after exclusion of WTCCC controls from the British 1958 Birth Cohort – sensitivity analysis.

| Measure                           | Fixed       |                 |                        | Random      |                 |                        |
|-----------------------------------|-------------|-----------------|------------------------|-------------|-----------------|------------------------|
|                                   | $\beta$ /OR | 95% CI          | P-value                | $\beta$ /OR | 95% CI          | P-value                |
| Average ROH number                | 0.73        | 0.52, 0.94      | $2.28 \times 10^{-11}$ | 0.73        | 0.51, 0.94      | $2.76 \times 10^{-11}$ |
| Average ROH length (kb)           | 4.83        | 0.95, 8.71      | 0.015                  | 4.78        | 0.90, 8.65      | 0.016                  |
| Average total length of ROHs (kb) | 1199.71     | 763.39, 1636.04 | $7.14 \times 10^{-8}$  | 1188.71     | 752.43, 1624.99 | $9.28 \times 10^{-8}$  |
| FROH                              | 1.15        | 1.11, 1.19      | $1.84 \times 10^{-13}$ | 1.14        | 1.10, 1.19      | $4.27 \times 10^{-13}$ |

Data for average number of homozygosity runs (ROH number), average ROH length and average total length of ROHs are  $\beta$ -coefficients [with respective confidence intervals and level of statistical significance (P-value) from regressing this homozygosity measure on case-control status with adjustment for cohort, age and sex (where appropriate)]; data on FROH (proportion of autosomal genome in ROHs) are expressed as odds ratios (OR) of coronary artery disease risk (with confidence intervals and corresponding level of statistical significance) with adjustment for cohort, age and sex (where appropriate); 95% CI – 95% confidence intervals, fixed – models with cohort as fixed effect, random – models with cohort as random effect

Table S6: Differences in average ROH number and FROH between individuals with coronary artery disease and controls after exclusion of cohorts with statistically significant CADxcohort or FROHxcohort interaction terms – sensitivity analysis

| Measure            | Fixed                |                        | Random               |                        |
|--------------------|----------------------|------------------------|----------------------|------------------------|
|                    | $\beta$ /OR (95% CI) | P-value                | $\beta$ /OR (95% CI) | P-value                |
| Average ROH Number | 1.06 (0.81, 1.31)    | $1.04 \times 10^{-16}$ | 1.05 (0.80, 1.30)    | $1.48 \times 10^{-16}$ |
| FROH               | 1.14 (1.10, 1.18)    | $2.01 \times 10^{-12}$ | 1.14 (1.10, 1.18)    | $4.52 \times 10^{-12}$ |

Data for average number of homozygosity runs (ROH number) are  $\beta$ -coefficients [with respective confidence intervals and level of statistical significance (P-value) from regressing this homozygosity measure on case-control status with adjustment for cohort, age and sex (where appropriate)]; data on FROH (proportion of autosomal genome in ROHs) are expressed as odds ratios (OR) of coronary artery disease risk (with confidence intervals and level of statistical significance) with adjustment for cohort, age and sex (where appropriate); 95% CI – 95% confidence intervals, sensitivity analysis – analysis of association conducted after exclusion of studies with significant CADxcohort or FROHxcohort interaction terms (WTCCC for average ROH number, and CCGB, GERMIFSIII, OHGS-A and OHGS-B for FROH), fixed – models with cohort as fixed effect, random – models with cohort as random effect

Table S7: Single nucleotide polymorphism enrichment of identified overlapping consensus ROHs.

| Number of SNPs in overlapping consensus ROH | Values       |
|---------------------------------------------|--------------|
| 2-9                                         | 1852 (10.90) |
| 10-49                                       | 6018 (35.42) |
| 50-99                                       | 3408 (20.06) |
| 100+                                        | 5711 (33.62) |
| Total                                       | 16,989       |

Data are counts and percentages, ROH – runs of homozygosity, SNP – single nucleotide polymorphism

Table S8: Top 10 overlapping consensus ROHs from analysis of association with coronary artery disease – age- and sex-adjusted analysis.

| Reg | Chr | BP1         | BP2         | Studies                    | SNPs | Cases | Controls | OR (95% CI)       | P-value               |
|-----|-----|-------------|-------------|----------------------------|------|-------|----------|-------------------|-----------------------|
| 1   | 3   | 34,972,502  | 34,973,514  | 7<br>(B, C, D, E, H, I, J) | 102  | 74    | 64       | 0.85 (0.40, 1.30) | 1.99x10 <sup>-4</sup> |
| 2   | 7   | 123,048,204 | 123,057,055 | 4<br>(C, D, I, J)          | 55   | 42    | 80       | 0.83 (0.38, 1.28) | 2.74x10 <sup>-4</sup> |
| 3   | 5   | 151,895,125 | 152,036,927 | 3<br>(C, D, J)             | 199  | 46    | 25       | 1.01 (0.46, 1.55) | 3.06x10 <sup>-4</sup> |
| 4   | 12  | 109,552,479 | 109,586,957 | 4<br>(A, E, G, I)          | 98   | 499   | 513      | 0.34 (0.15, 0.53) | 4.22x10 <sup>-4</sup> |
| 5   | 2   | 197,612,440 | 197,618,211 | 2<br>(C, I)                | 5    | 87    | 113      | 0.76 (0.34, 1.19) | 4.75x10 <sup>-4</sup> |
| 6   | 4   | 103,891,412 | 103,894,628 | 2<br>(E, J)                | 29   | 148   | 114      | 0.48 (0.21, 0.75) | 4.93x10 <sup>-4</sup> |
| 7   | 2   | 197,110,028 | 197,111,431 | 2<br>(C, E)                | 22   | 117   | 135      | 0.47 (0.21, 0.74) | 5.11x10 <sup>-4</sup> |
| 8   | 18  | 30,443,158  | 30,445,323  | 6<br>(A, B, D, E, I, K)    | 192  | 137   | 132      | 0.48 (0.21, 0.76) | 5.96x10 <sup>-4</sup> |
| 9   | 5   | 32,901,811  | 32,998,002  | 6<br>(C, D, E, G, H, K)    | 208  | 24    | 17       | 1.28 (0.54, 2.01) | 6.74x10 <sup>-4</sup> |
| 10  | 3   | 35,241,188  | 35,249,754  | 4<br>(D, E, G, J)          | 43   | 46    | 21       | 0.99 (0.41, 1.57) | 8.18x10 <sup>-4</sup> |

ROH – run of homozygosity, Reg – region, Chr – chromosome, BP1 – starting base pair position of the overlapping consensus ROH, BP2 – ending base pair position of the overlapping consensus ROH, OR – odds ratio of coronary artery disease after adjustment for age, sex, and study, P-value – level of statistical significance for case-control difference, A:CCGB, B:DUKE, C:GERMIFSI, D:GERMIFSII, E:GERMIFSI, F:ITH, G:OHGS-A, H:OHGS-B, I:OHGS-C, J:PennCATH, K:WTCCC, SNPs – average number of SNPs that each study contributed in the overlapping consensus ROH.



Table S9. Average mRNA expression differences in human monocytes between individuals with and without consensus ROHs – Cardiogenics Study.

| Chr | Location (Mb)     | SNPs | Individuals         |  | Gene            | $\beta$ (95% CI)     | P-value                |
|-----|-------------------|------|---------------------|--|-----------------|----------------------|------------------------|
|     |                   |      | with consensus ROHs |  |                 |                      |                        |
| 16  | 663.38-663.69     | 6    | 454                 |  | <i>DUS2L</i>    | -0.23 (-0.26, -0.19) | 5.74x10 <sup>-30</sup> |
| 16  | 669.09-669.17     | 4    | 228                 |  | <i>DUS2L</i>    | -0.16 (-0.20, -0.12) | 4.55x10 <sup>-13</sup> |
| 21  | 293.68-296.11     | 91   | 48                  |  | <i>C21ORF7</i>  | 0.70 (0.51, 0.89)    | 1.33x10 <sup>-11</sup> |
| 3   | 491.91-492.85     | 28   | 225                 |  | <i>WDR6</i>     | -0.15 (-0.20, -0.11) | 4.67x10 <sup>-11</sup> |
| 15  | 414.96-415.58     | 23   | 331                 |  | <i>ZSCAN29</i>  | 0.07 (0.05, 0.09)    | 1.81x10 <sup>-10</sup> |
| 15  | 414.27-414.76     | 18   | 325                 |  | <i>ZSCAN29</i>  | 0.07 (0.05, 0.09)    | 1.93x10 <sup>-10</sup> |
| 15  | 413.87-413.97     | 2    | 322                 |  | <i>ZSCAN29</i>  | 0.07 (0.05, 0.09)    | 4.22x10 <sup>-10</sup> |
| 3   | 491.75-491.76     | 2    | 233                 |  | <i>WDR6</i>     | -0.14 (-0.18, -0.10) | 5.27x10 <sup>-10</sup> |
| 15  | 416.22-416.83     | 6    | 352                 |  | <i>ZSCAN29</i>  | 0.07 (0.05, 0.09)    | 7.88x10 <sup>-10</sup> |
| 15  | 413.33-413.38     | 2    | 303                 |  | <i>ZSCAN29</i>  | 0.07 (0.05, 0.09)    | 1.34x10 <sup>-9</sup>  |
| 3   | 491.14-491.38     | 10   | 227                 |  | <i>WDR6</i>     | -0.14 (-0.18, -0.10) | 1.63x10 <sup>-9</sup>  |
| 15  | 417.06-417.07     | 2    | 353                 |  | <i>ZSCAN29</i>  | 0.06 (0.04, 0.08)    | 3.62x10 <sup>-9</sup>  |
| 3   | 487.46-490.15     | 50   | 227                 |  | <i>WDR6</i>     | -0.14 (-0.18, -0.09) | 4.08x10 <sup>-9</sup>  |
| 3   | 493.65 - 495.29   | 43   | 198                 |  | <i>WDR6</i>     | -0.14 (-0.18, -0.09) | 1.53x10 <sup>-8</sup>  |
| 16  | 660.34 - 660.47   | 3    | 467                 |  | <i>ATP6V0D1</i> | 0.10 (0.06, 0.13)    | 6.41x10 <sup>-8</sup>  |
| 16  | 663.38 - 663.69   | 6    | 454                 |  | <i>ATP6V0D1</i> | 0.09 (0.06, 0.13)    | 8.29x10 <sup>-8</sup>  |
| 3   | 486.37 - 486.47   | 8    | 242                 |  | <i>WDR6</i>     | -0.12 (-0.16, -0.08) | 1.21x10 <sup>-7</sup>  |
| 6   | 286.55 - 287.10   | 10   | 200                 |  | <i>ZNF193</i>   | 0.09 (0.06, 0.12)    | 1.87x10 <sup>-7</sup>  |
| 15  | 411.65 - 411.82   | 4    | 271                 |  | <i>ZSCAN29</i>  | 0.06 (0.04, 0.08)    | 1.91x10 <sup>-7</sup>  |
| 6   | 286.02 - 286.23   | 11   | 200                 |  | <i>ZNF193</i>   | 0.09 (0.06, 0.12)    | 2.10x10 <sup>-7</sup>  |
| 3   | 486.10 - 486.19   | 3    | 248                 |  | <i>WDR6</i>     | -0.12 (-0.16, -0.07) | 3.37x10 <sup>-7</sup>  |
| 16  | 669.09 - 669.17   | 4    | 228                 |  | <i>SLC7A6</i>   | 0.10 (0.06, 0.14)    | 6.87x10 <sup>-7</sup>  |
| 6   | 288.03 - 288.04   | 2    | 200                 |  | <i>ZNF193</i>   | 0.09 (0.06, 0.12)    | 7.78x10 <sup>-7</sup>  |
| 4   | 1037.94 - 1042.37 | 96   | 62                  |  | <i>MANBA</i>    | -0.15 (-0.21, -0.10) | 8.14x10 <sup>-7</sup>  |
| 16  | 658.30 - 658.86   | 10   | 452                 |  | <i>ATP6V0D1</i> | 0.09 (0.05, 0.12)    | 1.25x10 <sup>-6</sup>  |
| 10  | 756.07 - 757.01   | 17   | 177                 |  | <i>VCL</i>      | 0.10 (0.06, 0.13)    | 2.22x10 <sup>-6</sup>  |
| 13  | 956.09 - 958.69   | 101  | 71                  |  | <i>UGCGL2</i>   | 0.11 (0.07, 0.15)    | 2.49x10 <sup>-6</sup>  |
| 6   | 284.18 - 284.55   | 14   | 212                 |  | <i>ZNF193</i>   | 0.08 (0.05, 0.11)    | 3.00x10 <sup>-6</sup>  |
| 6   | 284.56 - 285.08   | 35   | 212                 |  | <i>ZNF193</i>   | 0.08 (0.05, 0.11)    | 3.96x10 <sup>-6</sup>  |
| 16  | 670.10 - 670.32   | 10   | 138                 |  | <i>SLC7A6</i>   | 0.12 (0.07, 0.17)    | 3.98x10 <sup>-6</sup>  |
| 6   | 308.72 - 308.75   | 6    | 45                  |  | <i>HLA-C</i>    | 0.26 (0.16, 0.37)    | 4.35x10 <sup>-6</sup>  |
| 16  | 670.10 - 670.32   | 10   | 138                 |  | <i>DUS2L</i>    | -0.12 (-0.17, -0.07) | 5.55 x10 <sup>-6</sup> |
| 6   | 282.81 - 283.17   | 18   | 197                 |  | <i>ZNF193</i>   | 0.08 (0.05, 0.11)    | 7.49 x10 <sup>-6</sup> |
| 10  | 759.90 - 760.13   | 3    | 168                 |  | <i>VCL</i>      | 0.09 (0.05, 0.13)    | 7.62 x10 <sup>-6</sup> |
| 10  | 755.26 - 755.30   | 2    | 177                 |  | <i>VCL</i>      | 0.09 (0.05, 0.13)    | 1.20x10 <sup>-5</sup>  |
| 3   | 1592.98 - 1599.09 | 187  | 19                  |  | <i>RARRES1</i>  | 0.14 (0.08, 0.20)    | 1.24x10 <sup>-5</sup>  |
| 2   | 1354.79 - 1362.11 | 139  | 378                 |  | <i>MCM6</i>     | -0.08 (-0.12, -0.05) | 1.67x10 <sup>-5</sup>  |
| 20  | 332.89 - 333.03   | 3    | 204                 |  | <i>UQC</i>      | 0.08 (0.05, 0.12)    | 2.05x10 <sup>-5</sup>  |
| 6   | 279.79 - 280.41   | 21   | 194                 |  | <i>ZNF193</i>   | 0.07 (0.04, 0.11)    | 2.41x10 <sup>-5</sup>  |
| 16  | 669.09 - 669.17   | 4    | 228                 |  | <i>SLC7A6</i>   | 0.09 (0.05, 0.13)    | 2.68x10 <sup>-5</sup>  |

|    |                 |    |     |                |                      |                       |
|----|-----------------|----|-----|----------------|----------------------|-----------------------|
| 16 | 663.38 – 663.69 | 6  | 454 | <i>DPEP3</i>   | 0.07 (0.04, 0.10)    | 2.70x10 <sup>-5</sup> |
| 10 | 761.02 – 761.36 | 8  | 144 | <i>ADK</i>     | -0.15 (-0.22, -0.09) | 3.19x10 <sup>-5</sup> |
| 16 | 670.10 – 670.32 | 10 | 138 | <i>SLC7A6</i>  | 0.10 (0.06, 0.15)    | 3.20x10 <sup>-5</sup> |
| 15 | 419.40 – 419.56 | 3  | 400 | <i>ZSCAN29</i> | 0.04 (0.02, 0.06)    | 3.47x10 <sup>-5</sup> |

Chr – chromosome, SNPs – number of SNPs in overlapping consensus region,  $\beta$  – regression coefficient, 95% CI – 95% confidence intervals, P-value – level of statistical significance for difference in gene expression between individuals with and without consensus ROHs adjusted for demographic parameters and genomic control. All identified associations have a false discovery rate q-value < 0.01. *DUS2L* – dihydrouridine synthase 2, *C21orf7* [MIM 611110] – MAP3K7 C-Terminal like, *WDR6* – WD repeat domain 6, *ZSCAN29* – zinc finger and SCAN domain containing 29, *ATP6V0D1* [MIM 607028] – ATPase, H<sup>+</sup> transporting, lysosomal 38kDa V0 subunit d1, *ZNF193* [MIM 602246] – zinc finger and SCAN domain containing 9, *SLC7A6* [MIM 605641] – solute carrier family 7 member 6, *MANBA* [MIM 609489] – mannosidase beta a, lysosomal, *VCL* [MIM 193065] – vinculin, *UGCGL2* [MIM 605898] – UDP-Glucose ceramide glucosyltransferase-like 2, *HLA-C* [MIM 142840] – major histocompatibility complex, class I, C, *RARRES1* [MIM 605090] – retinoic acid receptor responder (tazarotene induced) 1, *MCM6* [MIM 601806] – minichromosome maintenance complex component 6, *UQCC* [MIM 611797] – ubiquinol-cytochrome c reductase complex assembly factor 3, *DPEP3* [MIM 609926] – dipeptidase 3, *ADK* [MIM 102750] – adenosine kinase. Gene symbols appear more than once in the table because different consensus ROHs can be mapped onto the same gene array probe if there is more than one ROH within 100kb of the probe.

Table S10. Average mRNA Expression Differences in Human Macrophages between Individuals with and without Consensus ROHs: Cardiogenics Study

| Chr | Location (Mb) | SNPs | Individuals with Consensus ROHs | Gene           | $\beta$ (95% CI)     | p Value                |
|-----|---------------|------|---------------------------------|----------------|----------------------|------------------------|
| 3   | 491.91–492.85 | 28   | 225                             | <i>WDR6</i>    | −0.19 (−0.25, −0.14) | $4.57 \times 10^{-10}$ |
| 3   | 491.14–491.38 | 10   | 227                             | <i>WDR6</i>    | −0.19 (−0.24, −0.13) | $1.61 \times 10^{-9}$  |
| 3   | 491.75–491.76 | 2    | 233                             | <i>WDR6</i>    | −0.17 (−0.23, −0.12) | $1.86 \times 10^{-8}$  |
| 15  | 414.96–415.58 | 23   | 331                             | <i>ZSCAN29</i> | 0.08 (0.05, 0.10)    | $2.02 \times 10^{-8}$  |
| 15  | 414.27–414.76 | 18   | 325                             | <i>ZSCAN29</i> | 0.07 (0.05, 0.10)    | $2.34 \times 10^{-8}$  |
| 3   | 487.46–490.15 | 50   | 227                             | <i>WDR6</i>    | −0.17 (−0.23, −0.11) | $3.90 \times 10^{-8}$  |
| 15  | 413.87–413.97 | 2    | 322                             | <i>ZSCAN29</i> | 0.07 (0.05, 0.10)    | $4.85 \times 10^{-8}$  |
| 15  | 413.33–413.38 | 2    | 303                             | <i>ZSCAN29</i> | 0.07 (0.05, 0.09)    | $3.02 \times 10^{-7}$  |
| 15  | 417.06–417.07 | 2    | 353                             | <i>ZSCAN29</i> | 0.07 (0.04, 0.09)    | $3.46 \times 10^{-7}$  |
| 15  | 416.22–416.83 | 6    | 352                             | <i>ZSCAN29</i> | 0.07 (0.04, 0.09)    | $3.71 \times 10^{-7}$  |
| 3   | 486.37–486.47 | 8    | 242                             | <i>WDR6</i>    | −0.15 (−0.21, −0.10) | $7.81 \times 10^{-7}$  |
| 3   | 493.65–495.29 | 43   | 198                             | <i>WDR6</i>    | −0.16 (−0.22, −0.10) | $7.91 \times 10^{-7}$  |
| 3   | 486.10–486.19 | 3    | 248                             | <i>WDR6</i>    | −0.15 (−0.20, −0.09) | $1.49 \times 10^{-6}$  |
| 17  | 264.48–265.34 | 25   | 106                             | <i>EVI2A</i>   | −0.24 (−0.33, −0.14) | $5.22 \times 10^{-6}$  |
| 15  | 413.33–413.38 | 2    | 303                             | <i>ADAL</i>    | 0.04 (0.02, 0.06)    | $5.75 \times 10^{-6}$  |
| 15  | 413.87–413.97 | 2    | 322                             | <i>ADAL</i>    | 0.04 (0.02, 0.05)    | $1.04 \times 10^{-5}$  |
| 16  | 663.38–663.69 | 6    | 454                             | <i>DUS2L</i>   | −0.10 (−0.15, −0.06) | $1.50 \times 10^{-5}$  |

All identified associations have a false discovery rate q value  $< 0.01$ . Gene symbols appear more than once in the table because different consensus ROHs can be mapped onto the same gene array probe if there is more than one ROH within 100 kb of the probe.

Abbreviations are as follows: Chr, chromosome; SNPs, number of SNPs in overlapping consensus region;  $\beta$ , regression coefficient; 95% CI, 95% confidence intervals; p value, level of statistical significance for difference in gene expression between individuals with and without consensus ROHs adjusted for demographic parameters and genomic control; *WDR6*, WD repeat domain 6; *ZSCAN29*, zinc finger and SCAN domain containing 29; *EVI2A* (MIM: 158380), ecotropic viral integration site 2A; *ADAL*, adenosine deaminase-like; *DUS2L*, dihydrouridine synthase 2.

## Supplemental references

1. Schunkert, H., König, I.R., Kathiresan, S., Reilly, M.P., Assimes, T.L., Holm, H., Preuss, M., Stewart, A.F., Barbalic, M., Gieger, C., et al. (2011). Large-scale association analysis identifies 13 new susceptibility loci for coronary artery disease. *Nat Genet.* *43*, 333-8.
2. Samani, N.J., Burton, P., Mangino, M., Ball, S.G., Balmforth, A.J., Barrett, J., Bishop, T., Hall, A., BHF Family Heart Study Research Group. (2005). A genomewide linkage study of 1,933 families affected by premature coronary artery disease: The British Heart Foundation (BHF) Family Heart Study. *Am J Hum Genet.* *77*, 1011-20.
3. Alfakih, K., Brown, B., Lawrance, R.A., Warburton, P., Maqbool, A., Walters, K., Samani, N.J., Ball, S.G., Balmforth, A.J., Hall, A.S. (2007). Effect of a common X-linked angiotensin II type 2-receptor gene polymorphism (-1332 G/A) on the occurrence of premature myocardial infarction and stenotic atherosclerosis requiring revascularization. *Atherosclerosis.* *195*, e32-8.
4. Power, C., Elliott, J. (2006). Cohort profile: 1958 British birth cohort (National Child Development Study). *Int J Epidemiol.* *35*,34-41.
5. Burton, P.R., Clayton, D.G., Cardon, L.R., Craddock, N., Deloukas, P., Duncanson, A., Kwiatkowski, D.P., McCarthy, M.I., Ouwehand, W.H., Samani, N.J., et al. (2007). Genome-wide association study of 14,000 cases of seven common diseases and 3,000 shared controls. *Nature.* *447*, 661-78.
6. Samani, N.J., Erdmann, J., Hall, A.S., Hengstenberg, C., Mangino, M., Mayer, B., Dixon, R.J., Meitinger, T., Braund, P., Wichmann, H.E., et al. (2007). Genomewide association analysis of coronary artery disease. *N Engl J Med.* *357*, 443-53.
7. Broeckel, U., Hengstenberg, C., Mayer, B., Holmer, S., Martin, L.J., Comuzzie, A.G., Blangero, J., Nürnberg, P., Reis, A., Riegger, G.A., et al. (2002). A comprehensive linkage analysis for myocardial infarction and its related risk factors. *Nat Genet.* *30*, 210-4.
8. Fischer, M., Broeckel, U., Holmer, S., Baessler, A., Hengstenberg, C., Mayer, B., Erdmann, J., Klein, G., Riegger, G., Jacob, H.J., et al. (2005). Distinct heritable patterns of angiographic coronary artery disease in families with myocardial infarction. *Circulation.* *111*, 855-62.
9. Wichmann, H.E., Gieger, C., Illig, T., MONICA/KORA Study Group. (2005). KORA-gen--resource for population genetics, controls and a broad spectrum of disease phenotypes. *Gesundheitswesen.* *67 Suppl 1*, S26-30.
10. Erdmann, J., Grosshennig, A., Braund, P.S., König, I.R., Hengstenberg, C., Hall, A.S., Linsel-Nitschke, P., Kathiresan, S., Wright, B., Trégouët, D.A., et al. (2009). New susceptibility locus for coronary artery disease on chromosome 3q22.3. *Nat Genet.* *41*, 280-2.

11. Holle, R., Happich, M., Löwel, H., Wichmann, H.E., MONICA/KORA Study Group. (2005). KORA-a research platform for population based health research. *Gesundheitswesen. 67 Suppl 1*, S19-25.
12. Krawczak, M., Nikolaus, S., von Eberstein, H., Croucher, P.J., El Mokhtari, N.E., Schreiber, S. (2006). PopGen: population-based recruitment of patients and controls for the analysis of complex genotype-phenotype relationships. *Community Genet. 9*, 55-61.
13. Erdmann, J., Willenborg, C., Nahrstaedt, J., Preuss, M., König, I.R., Baumert, J., Linsel-Nitschke, P., Gieger, C., Tennstedt, S., Belcredi, P., et al. (2011). Genome-wide association study identifies a new locus for coronary artery disease on chromosome 10p11.23. *Eur Heart J. 32*, 158-68.
14. Löwel, H., Meisinger, C., Heier, M., Hörmann, A. (2005). The population-based acute myocardial infarction (AMI) registry of the MONICA/KORA study region of Augsburg. *Gesundheitswesen. 67 Suppl 1*, S31-7.
15. Peters, A., von Klot, S., Heier, M., Trentinaglia, I., Hörmann, A., Wichmann, H.E., Löwel, H., Cooperative Health Research in the Region of Augsburg Study Group. (2004). Exposure to traffic and the onset of myocardial infarction. *N Engl J Med. 351*, 1721-30.
16. Kolz, M., Baumert, J., Gohlke, H., Grallert, H., Döring, A., Peters, A., Wichmann, H.E., Koenig, W., Illig, T. (2009). Association study between variants in the fibrinogen gene cluster, fibrinogen levels and hypertension: results from the MONICA/KORA study. *Thromb Haemost. 101*, 317-24.
17. McPherson, R., Pertsemlidis, A., Kavaslar, N., Stewart, A., Roberts, R., Cox, D.R., Hinds, D.A., Pennacchio, L.A., Tybjaerg-Hansen, A., Folsom, A.R., et al. (2007). A common allele on chromosome 9 associated with coronary heart disease. *Science. 316*, 1488-1491.
18. Davies, R.W., Dandona, S., Stewart, A.F., Chen, L., Ellis, S.G., Tang, W.H., Hazen, S.L., Roberts, R., McPherson, R., Wells, G.A. (2010). Improved prediction of cardiovascular disease based on a panel of single nucleotide polymorphisms identified through genome-wide association studies. *Circ Cardiovasc Genet. 3*, 468-74.
19. Grant, S.F., Thorleifsson, G., Reynisdottir, I., Benediktsson, R., Manolescu, A., Sainz, J., Helgason, A., Stefansson, H., Emilsson, V., Helgadottir, A., et al. (2006). Variant of transcription factor 7-like 2 (TCF7L2) gene confers risk of type 2 diabetes. *Nat Genet. 38*, 320-3.
20. Kathiresan, S., Voight, B.F., Purcell, S., Musunuru, K., Ardissino, D., Mannucci, P.M., Anand, S., Engert, J.C., Samani, N.J., Schunkert, H., et al. (2009). Genome-wide association of early-onset myocardial infarction with single nucleotide polymorphisms and copy number variants. *Nat Genet. 41*, 334-341.
21. Yusuf, S., Hawken, S., Ounpuu, S., Dans, T., Avezum, A., Lanas, F., McQueen, M., Budaj, A., Pais, P., Varigos, J., et al. (2004). Effect of potentially modifiable risk factors

associated with myocardial infarction in 52 countries (the INTERHEART study): case-control study. *Lancet*. 364, 937-52.
